# Supplementary material
Source: MDPI journal article supplement (https://www.mdpi.com/2073-4441/10/12/1744)
Supplement: s1 [file s1]

## Country Questionnaire for Indicator 6.5.1

### Degree of integrated water resources management implementation (0 – 100)

#### Introduction

UN Environment is supporting countries in monitoring and reporting on Sustainable Development Goal (SDG) 6, including target 6.5: “By 2030, implement integrated water resources management at all levels, including through transboundary cooperation as appropriate”<sup>1</sup>. The target supports the equitable and efficient use of water resources, which is essential for social and economic development, as well as environmental sustainability.

Indicator 6.5.1 is: Degree of integrated water resources management implementation (0 – 100). Please refer to the “[Step-by-step Monitoring Methodology for Indicator 6.5.1](#)” for a full description of indicator 6.5.1, which provides additional guidance on completing the questionnaire, data collection, management and use.

The indicator score calculated using the responses to this questionnaire represents the current degree of IWRM implementation, on a scale from 0 to 100. The process of completing the questionnaire, including national multi-stakeholder workshops, supports countries in identifying barriers or delays to further progress, thereby providing a starting point for considering possible correcting actions towards achieving the IWRM target. The actions to achieve target 6.5 directly underpin the various other water-related targets within SDG-6.

The IWRM Focal Point is responsible for submitting the final completed questionnaire to UN Environment for formal submission. This can be done by using one of the following options (content is identical):

**Option 1:** Complete and submit the online version of the questionnaire in SurveyMonkey from the link available here:

<https://www.surveymonkey.com/r/LGLWVNH>

**Option 2:** Complete and submit the Microsoft Word version of the questionnaire to the HelpDesk either electronically or via post or fax:

HelpDesk at UN Environment

Email: [lwrm.Sdg6survey@unep.org](mailto:lwrm.Sdg6survey@unep.org)

---

<sup>1</sup> This is being done as part of the GEMI initiative, coordinated by UN-Water, for monitoring and reporting of SDG targets 6.3 - 6.6, 6a and 6b. Support is provided in close collaboration with a number of UN-Water members and partners.

Upon request, the helpdesk may provide support to the national IWRM focal points on matters such as interpretation of questions and thresholds, the appropriate level of stakeholder engagement in countries, and support to uploading/submitting the final indicator scores.

1

## About the Questionnaire

The questionnaire contains four sections, each covering a key component of IWRM:

- 1. Enabling Environment:** Creating the conditions that help to support the implementation of IWRM, which includes the most typical policy, legal and strategic planning tools for IWRM.
- 2. Institutions and Participation:** The range and roles of political, social, economic and administrative institutions and other stakeholder groups that help to support the implementation of IWRM.
- 3. Management Instruments:** The tools and activities that enable decision-makers and users to make rational and informed choices between alternative actions.
- 4. Financing:** Budgeting and financing made available and used for water resources development and management from various sources.

Each section has two sub-sections covering the “National” and “Other” levels. Various levels are covered to address the target 6.5 wording “... at all levels.” “Other” levels include sub-national, basin, local and transboundary (see glossary). Questions relate to these levels depending on their relevance to the particular aspect of IWRM.

For each question, a score between 0 and 100 should be selected, in increments of 10, unless the country judges the question to be ‘not applicable (n/a)’. The score selection is guided by descriptive text for six thresholds, which are specific to each question. If a country judges the degree of implementation to be between two thresholds, the increment of 10 between the two thresholds may be selected. The potential scores that may be given for each question are: 0, 10, 20, 30, 40, 50, 60, 70, 80, 90, 100.

The thresholds for each question are defined sequentially. This means that the criteria for all lower levels of implementation must be met in order for a country to respond that it has reached a specific level of implementation for each question. Furthermore, if an aspect of IWRM is specified in a lower threshold, it is implicit that this aspect must also be addressed in the higher thresholds for that question.

**The thresholds are indicative and are meant to guide countries in choosing the most appropriate responses, i.e. selected responses should be a reasonable match, but do not have to be a perfect match, as each country is unique.**

2

Respondents are strongly encouraged to add their justification for the score given in the space provided after each question, referencing evidence wherever possible (e.g. quoting reports, laws, plans etc.). This will significantly increase the robustness and objectivity of the questionnaire. It will help different stakeholder groups within the country to reach agreement on responses to each question; help countries analyse what is required to reach the next threshold; help countries to track progress over time; and allow for standardisation of degrees of implementation between countries. Countries are also welcome to provide additional relevant information or links to further documentation in the spaces provided after each question. Note that if 'Very high' or 'n/a' (not applicable) is selected as a response to any of the questions, the respondents are required to provide a brief justification for this.

Indicator 6.5.1 is calculated as follows:

1. Calculate the average score of each of the four sections by averaging all questions scores in each section.
2. Calculate the average of the four section scores to give the overall score for indicator 6.5.1.

If 'not applicable' is selected for any question, this will not be included in the indicator calculations, and therefore will not reduce the average score. All questions should be given a score, unless 'n/a' is selected. It is not possible to omit questions.

## Glossary

- **Authorities / organizations /institutions / departments:** administrative units.
- **Basins:** Includes rivers, lakes and aquifers, unless otherwise stipulated. For surface water, the term is interchangeable with 'catchments' and 'watersheds'.
- **Federal countries:** Refers to countries made up of federated states, provinces, territories or similar terms.
- **IWRM:** Integrated Water Resources Management (IWRM) is a process that promotes the coordinated development and management of water, land and related resources in order to maximise the resultant economic and social welfare in an equitable manner without compromising the sustainability of vital ecosystems. IWRM is not an end in itself but a means of achieving three key strategic objectives:
  - efficiency to use water resources in the best way possible; ○ equity in the allocation of water across social and economic groups; ○ environmental sustainability, to protect the water resource base, as well as associated ecosystems.
- **'Most significant' interstate basins:** For federal countries only. Basins that cross state/provincial borders and are of reasonably high significance to those states and/or the country.
- **National (level):** Refers to the highest level of administration in a country.
- **Sub-national / state (level):** refers to levels of administration other than national. For federated countries, these are likely to be provinces or states. Nonfederated countries may still have sub-national jurisdictions with some responsibility for water resources management, e.g. regions, counties, departments.
- **Programs:** Nation-wide plans of action with long-term objectives, for example to strengthen monitoring, knowledge sharing and capacity development, with details on what work is to be done, by whom, when, and what means or resources will be used.
- **Stakeholders:** In this questionnaire, stakeholders are the main groups important for water resources management, development and use. Examples of stakeholders in each group are given in footnotes as they appear in the survey.
- **Water Resources Management** is the activity of planning, developing, distributing and managing the optimum use of water resources. Ideally, water resource management planning has regard to all the competing demands for water and seeks to allocate water on an equitable basis to satisfy all uses and demands. An integrated approach (see IWRM) is needed to ensure water resources management is not isolated within sector silos resulting to inefficiencies, conflicts and unsustainable resource use. Generally in this questionnaire, WRM activities (e.g. policies, laws, capacity development), must be based on IWRM approaches to score 40 and above.

### Transboundary questions:

The transboundary questions for indicator 6.5.1 focus on the degree of implementation of IWRM at the transboundary level, as relevant to implementation of IWRM 'at all levels', as specified in target 6.5. Countries sharing basins of transboundary waters (rivers, lakes or aquifers) should answer the questions on transboundary issues. This information is complemented by indicator 6.5.2 'Proportion of transboundary basin area with an operational arrangement for water cooperation'.

To enable tracking of progress over time and for transparency, in the table below please list the transboundary (or 'international') basins or aquifers that are included in this survey. Only the most important transboundary basins or aquifers that are regarded as significant, in terms of economic, social or environmental value to the country (or neighbouring countries), need to be included in this survey. It is up to countries to decide which ones these are. When answering transboundary questions, the majority of the basins below must meet the criteria described in each threshold to achieve the score for that threshold.

|    | <b>Important basin / aquifer</b> |
|----|----------------------------------|
| 1. | [Name]                           |
| 2. |                                  |
| 3. |                                  |
| 4. |                                  |
|    | Please add rows as needed        |
|    |                                  |

## 1. Enabling Environment

This section covers the enabling environment, which is about creating the conditions that help to support the implementation of IWRM. It includes the most typical policy, legal and planning tools for IWRM<sup>2</sup>. Please refer to the glossary for any terms that may require further explanation. Please take note of all footnotes as they contain important information and clarification of terms used in the questions and thresholds.

Enter your score, **in increments of 10**, from 0-100, or n/a (not applicable), in the yellow cell immediately below each question. You are strongly encouraged to provide the justification and references to evidence for the score in the grey cell to the right of the score. This will help achieve agreement among different stakeholders in the country, as well as help monitor progress over time. Suggestions for the type of information required are provided. You may also provide further information you think is relevant, or links to further documentation. If 'Very high (100)' or 'n/a' is selected, a justification should be provided.

| 1. Enabling Environment                                                                                                                  |                                                     |                                                    |                                                                                                                                                                                             |                                                                                                           |                                                                          |                                                       |                                                                                                                 |
|------------------------------------------------------------------------------------------------------------------------------------------|-----------------------------------------------------|----------------------------------------------------|---------------------------------------------------------------------------------------------------------------------------------------------------------------------------------------------|-----------------------------------------------------------------------------------------------------------|--------------------------------------------------------------------------|-------------------------------------------------------|-----------------------------------------------------------------------------------------------------------------|
|                                                                                                                                          |                                                     | Degree of implementation (0 – 100)                 |                                                                                                                                                                                             |                                                                                                           |                                                                          |                                                       |                                                                                                                 |
|                                                                                                                                          |                                                     | Very low (0)                                       | Low (20)                                                                                                                                                                                    | Medium-low (40)                                                                                           | Medium-high (60)                                                         | High (80)                                             | Very high (100)                                                                                                 |
| <b>1.1 What is the status of policies, laws and plans to support Integrated Water Resources Management (IWRM) at the national level?</b> |                                                     |                                                    |                                                                                                                                                                                             |                                                                                                           |                                                                          |                                                       |                                                                                                                 |
| a                                                                                                                                        | National water resources <b>policy</b> , or similar | Development <b>not started</b> or not progressing. | Exists, but <b>not based on IWRM</b> .                                                                                                                                                      | <b>Based on IWRM, approved</b> by government and <b>starting to be used</b> by authorities to guide work. | <b>Being used by the majority</b> of relevant authorities to guide work. | Policy <b>objectives consistently achieved</b> .      | Objectives consistently achieved, and <b>periodically reviewed and revised</b> .                                |
|                                                                                                                                          | Score or n/a: [Enter score]                         | Justification/evidence                             | [Enter text here. E.g. reference to policy, when the policy was created/revised, examples of how the policy is being used to guide work, or which policy objectives are monitored/achieved] |                                                                                                           |                                                                          |                                                       |                                                                                                                 |
| b                                                                                                                                        | National <b>water resources law(s)</b>              | Development <b>not started</b> or not progressing. | Exists, but <b>not based on IWRM</b> .                                                                                                                                                      | <b>Based on IWRM, approved by government</b> and <b>starting to be applied</b> by authorities.            | <b>Being applied by the majority</b> of relevant authorities.            | <b>All laws are being applied</b> across the country. | <b>All laws are enforced</b> across the country, and <b>all people and organizations are held accountable</b> . |
|                                                                                                                                          | Score or n/a: [Enter score]                         | Justification/evidence                             | [Enter text here. E.g. reference to law(s), when it was created, mechanisms in place to apply/enforce the law, or examples of the law being applied]                                        |                                                                                                           |                                                                          |                                                       |                                                                                                                 |
|                                                                                                                                          |                                                     | Very low (0)                                       | Low (20)                                                                                                                                                                                    | Medium-low (40)                                                                                           | Medium-high (60)                                                         | High (80)                                             | Very high (100)                                                                                                 |

<sup>2</sup> For examples of good practices of policies, laws and plans, please see: GWP (Editor) (2004): Catalyzing Change: A handbook for developing IWRM and water efficiency strategies. Stockholm: Global Water Partnership (GWP).

|                                                                                            |                                                                                 |                                                                                           |                                                                                                                                                                  |                                                                                                      |                                                                          |                                                                               |                                                                                                                 |
|--------------------------------------------------------------------------------------------|---------------------------------------------------------------------------------|-------------------------------------------------------------------------------------------|------------------------------------------------------------------------------------------------------------------------------------------------------------------|------------------------------------------------------------------------------------------------------|--------------------------------------------------------------------------|-------------------------------------------------------------------------------|-----------------------------------------------------------------------------------------------------------------|
| c                                                                                          | National <b>integrated water resources management (IWRM) plans</b> , or similar | Development <b>not started</b> or not progressing.                                        | <b>Being prepared</b> , but not approved by government.                                                                                                          | <b>Approved</b> by government and <b>starting to be implemented</b> by authorities.                  | <b>Being implemented by the majority</b> of relevant authorities.        | Plan <b>objectives consistently achieved</b> .                                | Objectives consistently achieved, and <b>periodically reviewed and revised</b> .                                |
|                                                                                            | Score or n/a:                                                                   | [Enter score]                                                                             | Justification/evidence [Enter text here. E.g. reference to plans, progress reports]                                                                              |                                                                                                      |                                                                          |                                                                               |                                                                                                                 |
| <b>1.2 What is the status of policies, laws and plans to support IWRM at other levels?</b> |                                                                                 |                                                                                           |                                                                                                                                                                  |                                                                                                      |                                                                          |                                                                               |                                                                                                                 |
| a                                                                                          | <b>Sub-national<sup>3</sup> water resources policies</b> or similar             | <b>Development not started or delayed in most sub-national jurisdictions.</b>             | Exist in <b>most jurisdictions</b> , but <b>not necessarily based on IWRM</b> .                                                                                  | <b>Based on IWRM, approved by the majority</b> of authorities and starting to be used to guide work. | <b>Being used by the majority</b> of relevant authorities to guide work. | Policy objectives <b>consistently achieved by a majority of authorities</b> . | Objectives <b>consistently achieved by all</b> authorities, and <b>periodically reviewed and revised</b> .      |
|                                                                                            | Score or n/a:                                                                   | [Enter score]                                                                             | Justification/evidence [Enter text here. E.g. reference to policies, reports, evidence of implementation of policies]                                            |                                                                                                      |                                                                          |                                                                               |                                                                                                                 |
| b                                                                                          | <b>Basin/aquifer management plans<sup>4</sup></b> or similar, based on IWRM     | <b>Development not started or delayed in most</b> basins/aquifers of national importance. | <b>Being prepared for most</b> basins/aquifers of national importance.                                                                                           | <b>Approved in the majority</b> of basins/aquifers and starting to be used by authorities.           | <b>Being implemented in the majority</b> of basins/aquifers.             | Plan <b>objectives consistently achieved in majority</b> of basins/aquifers.  | Objectives consistently achieved in <b>all basins/aquifers</b> , and <b>periodically reviewed and revised</b> . |
|                                                                                            | Score or n/a:                                                                   | [Enter score]                                                                             | Justification/evidence [Enter text here. E.g. reference to most significant basins/aquifers, their plans, progress reports, evidence of implementation of plans] |                                                                                                      |                                                                          |                                                                               |                                                                                                                 |

|  |              |          |                 |                  |           |                 |
|--|--------------|----------|-----------------|------------------|-----------|-----------------|
|  | Very low (0) | Low (20) | Medium-low (40) | Medium-high (60) | High (80) | Very high (100) |
|--|--------------|----------|-----------------|------------------|-----------|-----------------|

<sup>3</sup> Sub-national includes jurisdictions not at national level, such as: states, provinces, counties, regions, or departments.

<sup>4</sup> At the basin/aquifer level, please include only the most important river basins, lake basins and aquifers for water supply or other reasons. This question only refers to these basins/aquifers. These basins/aquifers are likely to cross administrative borders, including state/provincial borders for federal countries. The basins may also cross national borders, but this question refers to management of the portions of basins within each country. Question 1.2c refers specifically to transboundary arrangements for basins/aquifers shared by countries.

|                                             |                                                                                                        |                                                           |                                                                 |                                                                                                                    |                                                                  |                                                                 |                                                                                                                   |
|---------------------------------------------|--------------------------------------------------------------------------------------------------------|-----------------------------------------------------------|-----------------------------------------------------------------|--------------------------------------------------------------------------------------------------------------------|------------------------------------------------------------------|-----------------------------------------------------------------|-------------------------------------------------------------------------------------------------------------------|
| c                                           | <b>Arrangements for transboundary water management in most important basins / aquifers<sup>5</sup></b> | Development not started or not progressing.               | <b>Being prepared or negotiated.</b>                            | <b>Arrangements are adopted.</b>                                                                                   | Arrangements' provisions are <b>partly implemented.</b>          | <b>Most of the arrangements' provisions are implemented.</b>    | The arrangements' provisions are <b>fully implemented.</b>                                                        |
|                                             | Score or n/a:                                                                                          | [Enter score]                                             | Justification/evidence                                          | [Enter text here. E.g. reference to arrangements, reports, evidence of implementation.]                            |                                                                  |                                                                 |                                                                                                                   |
| d                                           | <b>FEDERAL COUNTRIES ONLY: Provincial/state water resources laws.</b>                                  | <b>Development not started or delayed in most states.</b> | Exist in most jurisdictions, but not necessarily based on IWRM. | <b>Based on IWRM, approved in most states and starting to be applied by authorities in the minority of states.</b> | <b>Some laws</b> being applied in the <b>majority</b> of states. | <b>All laws</b> being applied in the <b>majority</b> of states. | <b>All laws</b> being applied in <b>all</b> states, and <b>all people and organizations</b> are held accountable. |
|                                             | Score or n/a:                                                                                          | [Enter score]                                             | Justification/evidence                                          | [Enter text here. E.g. reference to laws, mechanisms for enforcement, examples of enforcement]                     |                                                                  |                                                                 |                                                                                                                   |
| <b>Average 'Enabling Environment' score</b> |                                                                                                        |                                                           | [Enter score here]                                              | In case of 'n/a' for any questions, they should be omitted from the average calculation.                           |                                                                  |                                                                 |                                                                                                                   |

## 2. Institutions and Participation

This section is about the range and roles of political, social, economic and administrative institutions that help to support the implementation of IWRM. It includes some of the most typical institutions at different levels of society for IWRM. It includes institutional capacity and effectiveness, cross-sector coordination, stakeholder participation and gender equality. The 2030 Agenda stresses the importance of partnerships that will require public participation and creating synergies with the business sector. Note that public participation is also addressed in the 'means of implementation' Target 6.b: "Support and strengthen the participation of local communities in improving water and sanitation management", which is monitored by indicator 6.b.1: "Proportion of local administrative units with established and operational policies and procedures for participation of local communities in water and sanitation management".

### Terminology used in the questions:

- **Government authorities:** could be a ministry or ministries, or other organizations/institutions/agencies/bodies with a mandate and funding from government.

<sup>5</sup> An arrangement can be a bilateral or multilateral treaty, convention, agreement or other arrangement (e.g. memorandum of understanding) between riparian countries on the management of a transboundary basin/aquifer. Refers to international basins/aquifers only. Arrangements may be interstate, intergovernmental, inter-ministerial, interagency or between regional authorities.

- **Capacity for leading implementation:** in this context is that the responsible authorities should be adapted to the complexity of water challenges to be met and have the required knowledge, technical facilities and skills, including planning, rule-making, project management, finance, budgeting, data collection and monitoring, risk management and evaluation. It should include the ability to manage potential conflicts of interest between different sectors and/or stakeholder groups, particularly at the basin/aquifer level.
- **Sectors** relates to coordination between the government authorities responsible for water management and those responsible for other sectors (such as agriculture, energy, climate, environment etc.) that are dependent on water, or impact on water. Coordination between groundwater and surface water development/management should also be optimised. The relevant sectors should be considered according to their importance for the country.
- **Stakeholder** includes all interested parties who are, or may be, affected by any water resources issue or intervention. It includes organizations, institutions, academia, civil society and individuals. While definitions of stakeholders typically include the private (or business) sector, this particular stakeholder group is dealt with separately in this questionnaire (see below).
- **Business** includes private for-profit groups. It does not include government or civil society.

Please refer to the glossary for any terms that may require further explanation. Please take note of all footnotes as they contain important information and clarification of terms used in the questions and thresholds.

Enter your score, **in increments of 10**, from 0-100, or n/a (not applicable), in the yellow cell immediately below each question. You are strongly encouraged to provide the justification and references to evidence for the score in the grey cell to the right of the score. This will help achieve agreement among different stakeholders in the country, as well as help monitor progress over time. Suggestions for the type of information required are provided. You may also provide further information you think is relevant, or links to further documentation. If 'Very high (100)' or 'n/a' is selected, a justification should be provided.

| 2. Institutions and Participation                                                     |                                    |          |                 |                  |           |                 |
|---------------------------------------------------------------------------------------|------------------------------------|----------|-----------------|------------------|-----------|-----------------|
|                                                                                       | Degree of implementation (0 – 100) |          |                 |                  |           |                 |
|                                                                                       | Very low (0)                       | Low (20) | Medium-low (40) | Medium-high (60) | High (80) | Very high (100) |
| 2.1 What is the status of institutions for IWRM implementation at the national level? |                                    |          |                 |                  |           |                 |

|   |                                                                                                                                                             |                      |                                                                                                  |                                                                                                                                           |                                                                                                                                |                                                                                                                             |                                                                                                                                                                                   |                                                                                                                                    |
|---|-------------------------------------------------------------------------------------------------------------------------------------------------------------|----------------------|--------------------------------------------------------------------------------------------------|-------------------------------------------------------------------------------------------------------------------------------------------|--------------------------------------------------------------------------------------------------------------------------------|-----------------------------------------------------------------------------------------------------------------------------|-----------------------------------------------------------------------------------------------------------------------------------------------------------------------------------|------------------------------------------------------------------------------------------------------------------------------------|
| a | National <b>government authorities</b> <sup>6</sup> <b>capacity</b> <sup>7</sup> for leading implementation of national IWRM plans or similar               |                      | <b>No dedicated government authorities</b> for water resources management.                       | Authorities exist, with <b>clear mandate to lead water resources management.</b>                                                          | Authorities have clear mandate to lead IWRM implementation, and the <b>capacity to effectively lead IWRM plan formulation.</b> | Authorities have the <b>capacity to effectively lead IWRM plan implementation.</b>                                          | Authorities have the capacity to effectively lead <b>periodic monitoring and evaluation of the IWRM plan.</b>                                                                     | Authorities have the capacity to effectively lead <b>periodic IWRM plan revision.</b>                                              |
|   | Score or n/a:                                                                                                                                               | <b>[Enter score]</b> | Justification/evidence                                                                           | [Enter text here. E.g. reference to authorities and mandates, levels of capacity, reports]                                                |                                                                                                                                |                                                                                                                             |                                                                                                                                                                                   |                                                                                                                                    |
| b | <b>Coordination between national government authorities representing different sectors</b> <sup>8</sup> on water resources, policy, planning and management |                      | <b>No communication</b> between different government sectors on policy, planning and management. | <b>Communication: Information</b> on water resources, policy, planning and management <b>is made available between different sectors.</b> | <b>Consultation: Information, experiences and opinions are shared between different sectors.</b>                               | <b>Participation: Opportunities</b> for different sectors <b>to take part in</b> policy, planning and management processes. | <b>Representation: Formal consultation</b> between different government sectors <b>with the objective of agreeing on collective decisions on important issues and activities.</b> | <b>Co-decisions and co-production: Shared power between different sectors</b> on joint policy, planning and management activities. |
|   | Score or n/a:                                                                                                                                               | <b>[Enter score]</b> | Justification/evidence                                                                           | [Enter text here. E.g. reference to mechanisms for cross-sectoral coordination, evidence of meetings, reports]                            |                                                                                                                                |                                                                                                                             |                                                                                                                                                                                   |                                                                                                                                    |

|              |          |                 |                  |           |                 |
|--------------|----------|-----------------|------------------|-----------|-----------------|
| Very low (0) | Low (20) | Medium-low (40) | Medium-high (60) | High (80) | Very high (100) |
|--------------|----------|-----------------|------------------|-----------|-----------------|

<sup>6</sup> 'Government authorities' could be a ministry or ministries, or other organizations/institutions/agencies/bodies with a mandate and funding from government.

<sup>7</sup> 'Capacity for leading implementation' in this context is that the responsible authorities should be adapted to the complexity of water challenges to be met and have the required knowledge and technical skills, including planning, rule-making, project management, finance, budgeting, data collection and monitoring, risk management and evaluation. Beyond having the capacity to lead implementation of the activities listed in the thresholds, authorities must also actually be leading the implementation of these activities.

<sup>8</sup> Relates to coordination between the government authorities responsible for water management and those responsible for other sectors (such as agriculture, energy, climate, environment etc.) that are dependent on water, or impact on water. Coordination between groundwater and surface water development/management should also be optimised. The relevant sectors should be considered according to their importance for the country.

|   |                                                                                                                  |                                                                                                                |                                                                                                                                                                                     |                                                                                                                                |                                                                                                                                         |                                                                                                                                                |                                                                                                                                                                                 |
|---|------------------------------------------------------------------------------------------------------------------|----------------------------------------------------------------------------------------------------------------|-------------------------------------------------------------------------------------------------------------------------------------------------------------------------------------|--------------------------------------------------------------------------------------------------------------------------------|-----------------------------------------------------------------------------------------------------------------------------------------|------------------------------------------------------------------------------------------------------------------------------------------------|---------------------------------------------------------------------------------------------------------------------------------------------------------------------------------|
| c | <b>Public participation</b> in water resources, policy, planning and management <sup>9</sup> at national level.  | <b>No communication</b> between government and stakeholders on policy, planning and management.                | <b>Communication: Information</b> on water resources, policy, planning and management <b>is made available to stakeholders.</b>                                                     | <b>Consultation:</b> Government authorities <b>occasionally request</b> information, experiences and opinions of stakeholders. | <b>Consultation:</b> Government authorities <b>regularly request</b> information, experiences and opinions of stakeholders.             | <b>Participation:</b> Regular opportunities for stakeholders <b>to take part in relevant</b> policy, planning and management <b>processes.</b> | <b>Representation: Formal representation of</b> stakeholders in government processes <b>contributing to decision making on important issues and activities, as appropriate.</b> |
|   | Score or n/a: <b>[Enter score]</b>                                                                               | Justification/evidence                                                                                         | [Enter text here. E.g. mechanisms for public participation, types of stakeholder groups that participate or any significant ones that do not, evidence of degree of participation.] |                                                                                                                                |                                                                                                                                         |                                                                                                                                                |                                                                                                                                                                                 |
| d | <b>Business<sup>10</sup> participation</b> in water resources development, management and use at national level. | <b>No communication</b> between government and business about water resources development, management and use. | <b>Limited communication</b> between government and business about water resources development, management and use.                                                                 | <b>Regular consultation</b> between government and business about water resources development, management and use.             | <b>Limited opportunities</b> for private sector involvement established for water resources development, management and use activities. | <b>Regular opportunities for private sector involvement</b> established for water resources development, management and use activities.        | <b>Effective private sector involvement</b> established for water resources development, management and use activities.                                                         |
|   | Score or n/a: <b>[Enter score]</b>                                                                               | Justification/evidence                                                                                         | [Enter text here. E.g. mechanisms for public participation, types of businesses that participate or any significant ones that do not, evidence of degree of participation]          |                                                                                                                                |                                                                                                                                         |                                                                                                                                                |                                                                                                                                                                                 |
| e | <b>Gender-specific objectives</b> for water resources management at national level. <sup>11</sup>                | <b>Gender not explicitly addressed</b> throughout national laws, policy or plans.                              | <b>Gender partially addressed</b> throughout national laws, policies or plans.                                                                                                      | <b>Gender addressed</b> in national plans but with <b>limited budget and implementation.</b>                                   | Gender addressed in national plans, <b>partially funded and objectives partly achieved.</b>                                             | Activities <b>adequately funded and objectives mostly achieved.</b>                                                                            | Objectives <b>fully achieved and adequately address gender issues.</b>                                                                                                          |

<sup>9</sup> Stakeholder includes all interested parties who are, or may be, affected by any water resources issue or intervention. It includes organizations, institutions, academia, civil society and individuals.

<sup>10</sup> Business includes private for-profit groups. It does not include government or civil society.

<sup>11</sup> Gender-specific objectives at national level can include: 1) Presence of designated ministerial responsibility for gender in relation to water policies. Presence of designated ministerial responsibility for water in the gender-equality ministry or related designated agency for gender; 2) Gender Parity of male and female participants in meetings of national decision-making authorities (counting the number of women and men participating in meetings); and 3) The presence of gender-specific objectives and commitments (or gender strategies) in national strategies, national plans and national laws regarding national water policy.

Source: adapted from WWAP 2015 "Questionnaire for collecting sex-disaggregated water data" <http://unesdoc.unesco.org/images/0023/002345/234514E.pdf>

|               |               |                        |                                                                                                                               |
|---------------|---------------|------------------------|-------------------------------------------------------------------------------------------------------------------------------|
| Score or n/a: | [Enter score] | Justification/evidence | [Enter text here. E.g. reference to gender objectives in laws/policies/plans, programs to address gender objectives, reports] |
|---------------|---------------|------------------------|-------------------------------------------------------------------------------------------------------------------------------|

|   |                                                                    | Very low (0)                                                           | Low (20)                                                                                            | Medium-low (40)                                                                                                                          | Medium-high (60)                                                                                                                     | High (80)                                                                                                                                                              | Very high (100)                                                                                                                                                              |
|---|--------------------------------------------------------------------|------------------------------------------------------------------------|-----------------------------------------------------------------------------------------------------|------------------------------------------------------------------------------------------------------------------------------------------|--------------------------------------------------------------------------------------------------------------------------------------|------------------------------------------------------------------------------------------------------------------------------------------------------------------------|------------------------------------------------------------------------------------------------------------------------------------------------------------------------------|
| f | <b>Developing IWRM capacity<sup>12</sup></b> at the national level | <b>No capacity development specific to water resources management.</b> | <b>Occasional</b> capacity development, generally limited to <b>short-term / ad-hoc activities.</b> | <b>Some long-term</b> capacity development initiatives are being implemented, but geographic and stakeholder <b>coverage is limited.</b> | <b>Long-term</b> capacity development initiatives are being implemented, and geographic and stakeholder <b>coverage is adequate.</b> | <b>Long-term</b> capacity development initiatives are being implemented, with <b>effective outcomes</b> , and geographic and stakeholder <b>coverage is very good.</b> | <b>Long-term</b> capacity development initiatives are being implemented with <b>highly effective outcomes</b> , and geographic and stakeholder <b>coverage is excellent.</b> |

|               |               |                        |                                                                                                         |
|---------------|---------------|------------------------|---------------------------------------------------------------------------------------------------------|
| Score or n/a: | [Enter score] | Justification/evidence | [Enter text here. E.g. reference to capacity development programs, geographic and stakeholder coverage] |
|---------------|---------------|------------------------|---------------------------------------------------------------------------------------------------------|

## 2.2 What is the status of institutions for IWRM implementation at other levels?

|   |                                                                                                                         |                                                                       |                                                                                  |                                                                                                                                |                                                                                    |                                                                                                               |                                                                                       |
|---|-------------------------------------------------------------------------------------------------------------------------|-----------------------------------------------------------------------|----------------------------------------------------------------------------------|--------------------------------------------------------------------------------------------------------------------------------|------------------------------------------------------------------------------------|---------------------------------------------------------------------------------------------------------------|---------------------------------------------------------------------------------------|
| a | <b>Basin/aquifer level<sup>13</sup> organizations<sup>14</sup></b> for leading implementation of IWRM plans or similar. | <b>No dedicated basin authorities for water resources management.</b> | Authorities exist, with <b>clear mandate to lead water resources management.</b> | Authorities have clear mandate to lead IWRM implementation, and the <b>capacity to effectively lead IWRM plan formulation.</b> | Authorities have the <b>capacity to effectively lead IWRM plan implementation.</b> | Authorities have the <b>capacity to effectively lead periodic monitoring and evaluation</b> of the IWRM plan. | Authorities have the <b>capacity to effectively lead periodic IWRM plan revision.</b> |
|---|-------------------------------------------------------------------------------------------------------------------------|-----------------------------------------------------------------------|----------------------------------------------------------------------------------|--------------------------------------------------------------------------------------------------------------------------------|------------------------------------------------------------------------------------|---------------------------------------------------------------------------------------------------------------|---------------------------------------------------------------------------------------|

|               |               |                        |                                                                                                              |
|---------------|---------------|------------------------|--------------------------------------------------------------------------------------------------------------|
| Score or n/a: | [Enter score] | Justification/evidence | [Enter text here. E.g. reference to authorities and evidence of capacity for leading implementation of IWRM] |
|---------------|---------------|------------------------|--------------------------------------------------------------------------------------------------------------|

<sup>12</sup> IWRM capacity development: refers to the enhancement of skills, instruments, resources and incentives for people and institutions at all levels, to improve IWRM implementation. Capacity needs assessments are essential for effective and cost-effective capacity development. Capacity development programs should consider gender balance and disadvantaged/minority groups in terms of participation and awareness. Capacity development is relevant for many groups, including: local and central government, water professionals in all areas - both public and private water organisations, civil society, and in regulatory organisations. In this instance, capacity development may also include primary, secondary and tertiary education, and academic research concerning IWRM.

<sup>13</sup> At the basin/aquifer level, please include only the most important river basins, lake basins and aquifers for water supply or for other reasons. This question only refers to these basins/aquifers. These basins/aquifers likely cross-administrative borders, including state/provincial borders for federal countries. The basins may also cross national borders, but this question refers to management of the portions of basins within each country. Question 2.2e refers specifically to transboundary management of basins/aquifers shared by countries.

<sup>14</sup> Could be organization, committee, inter-ministerial mechanism or other means of collaboration for managing water resources at the basin level.

|   |                                                                                                                                                  | Very low (0)                                                                      | Low (20)                                                                                                                      | Medium-low (40)                                                                                                                                                                                                            | Medium-high (60)                                                                                                | High (80)                                                                                    | Very high (100)                                                                                                                                          |
|---|--------------------------------------------------------------------------------------------------------------------------------------------------|-----------------------------------------------------------------------------------|-------------------------------------------------------------------------------------------------------------------------------|----------------------------------------------------------------------------------------------------------------------------------------------------------------------------------------------------------------------------|-----------------------------------------------------------------------------------------------------------------|----------------------------------------------------------------------------------------------|----------------------------------------------------------------------------------------------------------------------------------------------------------|
| b | <b>Public participation</b> <sup>14</sup><br>between local water authorities management at the policy, planning and information, experiences and | <b>No communication</b><br><b>Local level</b><br>Government authorities regularly | <b>Communication:</b><br>Government for stakeholders to occasionally request information, making on important                 | <b>Consultation:</b><br>Regular opportunities to stakeholders on local level policy, experiences and opinions of stakeholders.                                                                                             | <b>Consultation:</b><br>representation of policy, planning and local level contributing to decision management. | <b>Participation:</b><br><b>Representation:</b> Formal in government and authority processes | <b>information on</b><br>water resources, management <b>local level</b> <sup>15</sup><br>management is made local issues and activities, as appropriate. |
|   | Score or n/a: [Enter score]                                                                                                                      |                                                                                   | Justification/evidence                                                                                                        | [Enter text here. E.g. mechanisms for public participation, types of stakeholder groups that participate or any significant ones that do not, evidence of degree of participation, geographic differences across country.] |                                                                                                                 |                                                                                              |                                                                                                                                                          |
| c | <b>Gender-specific sub-national laws,</b>                                                                                                        | <b>Gender not explicitly addressed</b> throughout national laws, policies         | <b>Gender partially addressed</b> in sub-national plans but with limited                                                      | <b>Gender addressed</b> in sub-national plans partially funded and                                                                                                                                                         | <b>Gender addressed</b> in sub-national plans, objectives mostly                                                | Activities adequately funded and adequately address                                          | Objectives fully achieved and national levels <sup>16</sup> sub-national gender                                                                          |
|   | Score or n/a: [Enter score]                                                                                                                      | Justification/evidence                                                            | [Enter text here. E.g. reference to gender objectives in laws/policies/plans, programs to address gender objectives, reports] | <b>implementation.</b>                                                                                                                                                                                                     | <b>achieved.</b>                                                                                                | <b>issues.</b>                                                                               |                                                                                                                                                          |
| d | <b>Gender-specific plans at transboundary level</b> <sup>17</sup>                                                                                | <b>Gender not explicitly addressed</b> in transboundary                           | <b>Gender partially addressed</b> in transboundary plans but with limited                                                     | <b>Gender addressed</b> in transboundary plans, policies or plans.                                                                                                                                                         | <b>Gender addressed</b> in transboundary plans, partially funded and                                            | Activities adequately achieved and objectives mostly                                         | Objectives fully achieved and adequately address                                                                                                         |
|   | Score or n/a: [Enter score]                                                                                                                      | Justification/evidence                                                            | [Enter text here. E.g. reference to gender objectives in laws/policies/plans, programs to address gender objectives, reports] | <b>implementation.</b>                                                                                                                                                                                                     | <b>achieved.</b>                                                                                                | <b>issues.</b>                                                                               |                                                                                                                                                          |
|   |                                                                                                                                                  |                                                                                   |                                                                                                                               | <b>transboundary gender implementation.</b>                                                                                                                                                                                | <b>achieved.</b>                                                                                                | <b>issues.</b>                                                                               |                                                                                                                                                          |

<sup>14</sup> Stakeholder includes all interested parties who are, or may be, affected by any water resources issue or intervention. It includes organizations, institutions, academia, civil society and individuals.

<sup>15</sup> Examples of 'local level' include municipal level (e.g. cities, towns and villages), community level, basin/tributary/aquifer/delta level, and water user associations.

<sup>16</sup> Gender-specific objectives at sub-national level can include: 1) Proportion of seats held by male and female in local water authorities' executive boards; 2) Gender Parity of M/F participation in meetings of sub-national decision-making authorities (counting the number of women and men participating in meetings); 3) The presence of gender strategy in local plans and local implementation policies. Source: adapted from WWAP 2015 "Questionnaire for collecting sex-disaggregated water data"

<http://unesdoc.unesco.org/images/0023/002345/234514E.pdf>

<sup>17</sup> Gender-specific objectives at the transboundary level: 1) Presence of a specific gender strategy in transboundary agreements, in other transboundary arrangements, in their implementation plans and in all transboundary water impact assessments; 2) Gender Parity of male and female participants in meetings of transboundary decision-making authorities (counting the number of women and men participating in meetings). Source: adapted from WWAP 2015 "Questionnaire for collecting sex-disaggregated water data"

<http://unesdoc.unesco.org/images/0023/002345/234514E.pdf>

| Score or n/a: [Enter score]      |                                                                                                       | Justification/evidence [Enter text here. E.g. reference to gender objectives in policies/plans, programs to address gender objectives, reports] |                                                           |                                                           |                                                           |                                                           |                                                           |
|----------------------------------|-------------------------------------------------------------------------------------------------------|-------------------------------------------------------------------------------------------------------------------------------------------------|-----------------------------------------------------------|-----------------------------------------------------------|-----------------------------------------------------------|-----------------------------------------------------------|-----------------------------------------------------------|
|                                  |                                                                                                       | Very low (0)                                                                                                                                    | Low (20)                                                  | Medium-low (40)                                           | Medium-high (60)                                          | High (80)                                                 | Very high (100)                                           |
| e                                | <b>Organizational framework(s)' mandate management for / aquifers<sup>18</sup></b>                    | No organizational framework(s) for the most part.                                                                                               | Organizational framework(s) for the most important basins |
| f                                | <b>FEDERAL COUNTRIES ONLY: Provincial / provincial water resources IWRM monitoring plan revision.</b> | <b>No dedicated</b>                                                                                                                             | Authorities exist, with                                   | Authorities have clear                                    | Authorities have the                                      | Authorities have the                                      | Authorities have the                                      |
|                                  | <b>water resources management.</b>                                                                    | lead IWRM plan effectively                                                                                                                      | lead IWRM plan effectively                                | lead IWRM plan effectively                                | lead IWRM plan effectively                                | lead IWRM plan effectively                                | lead IWRM plan effectively                                |
|                                  | <b>resources management.</b>                                                                          | the capacity to                                                                                                                                 | and evaluation of management                              | effectively lead IWRM                                     | the IWRM plan.                                            |                                                           |                                                           |
|                                  | <b>Average 'Institutions and Participation' score</b>                                                 |                                                                                                                                                 | [Enter score here]                                        | In case of 'n/a' for any                                  | questions, they should be omitted from the average        | calculation.                                              |                                                           |
| <b>3. Management Instruments</b> |                                                                                                       |                                                                                                                                                 |                                                           |                                                           |                                                           |                                                           |                                                           |

This section includes the tools that enable decision-makers and users to make rational and informed choices between alternative actions. It includes management programs, monitoring water resources and the pressures on them, knowledge sharing and capacity development.

#### Terminology used in the questions:

- **Limited, Adequate, Very good, Excellent:** Are terms used describe the status, coverage and effectiveness of the management instruments assessed in this section. Respondents should apply their own judgement based on the 'best-practice' descriptions of management instruments in the glossary, the section introduction, and through footnotes. For example, 'adequate' may imply that the basic minimum criteria for that particular management instrument are met. Respondents are encouraged to provide qualifying information to the question score in the 'Justification' cell immediately below each question.
- **Management instruments:** Can also be referred to as management tools and techniques, which include regulations, financial incentives, monitoring, plans/programs (e.g. for development, use and protection of water resources), as well as those specified in footnotes on questions and thresholds below.

<sup>18</sup> An organizational framework can include the existence of a joint body, joint mechanism or commission for transboundary cooperation. Refers to international basins/aquifers only.

- **Monitoring:** collecting, updating, and sharing timely, consistent and comparable water-related data and information, relevant for science and policy. Effective monitoring requires ongoing commitment and financing from government. Resources required include appropriate technical capacity such as laboratories, portable devices, online water use control and data acquisition systems. May include a combination of physical data collection, remote sensing, and modelling for filling data gaps.
- **Short-term / Long-term:** In the context of management instruments, short-term includes ad-hoc activities and projects, generally not implemented as part of an overarching program with long-term goals. Long-term refers to activities that are undertaken as part of an ongoing program that has more long-term goals/aims and implementation strategy.

Please take note of all footnotes as they contain important information and clarification of terms used in the questions and thresholds.

Enter your score, **in increments of 10**, from 0-100, or n/a (not applicable), in the yellow cell immediately below each question. You are strongly encouraged to provide the justification and references to evidence for the score in the grey cell to the right of the score. This will help achieve agreement among different stakeholders in the country, as well as help monitor progress over time. Suggestions for the type of information required are provided. You may also provide further information you think is relevant, or links to further documentation. If 'Very high (100)' or 'n/a' is selected, a justification should be provided.

| 3. Management Instruments                                                                                     |                                                                                                                                      |                                                 |                                                                                                        |                                                                                                                                                              |                                                                                                                    |                                                                                                                      |                                                                                                                       |
|---------------------------------------------------------------------------------------------------------------|--------------------------------------------------------------------------------------------------------------------------------------|-------------------------------------------------|--------------------------------------------------------------------------------------------------------|--------------------------------------------------------------------------------------------------------------------------------------------------------------|--------------------------------------------------------------------------------------------------------------------|----------------------------------------------------------------------------------------------------------------------|-----------------------------------------------------------------------------------------------------------------------|
|                                                                                                               |                                                                                                                                      | Degree of implementation (0 – 100)              |                                                                                                        |                                                                                                                                                              |                                                                                                                    |                                                                                                                      |                                                                                                                       |
|                                                                                                               |                                                                                                                                      | Very low (0)                                    | Low (20)                                                                                               | Medium-low (40)                                                                                                                                              | Medium-high (60)                                                                                                   | High (80)                                                                                                            | Very high (100)                                                                                                       |
| <b>3.1 What is the status of management instruments to support IWRM implementation at the national level?</b> |                                                                                                                                      |                                                 |                                                                                                        |                                                                                                                                                              |                                                                                                                    |                                                                                                                      |                                                                                                                       |
| a                                                                                                             | <b>National monitoring of water availability</b> <sup>19</sup><br>(includes surface and/or groundwater, as relevant to the country). | <b>No national monitoring systems in place.</b> | Monitoring systems established for a limited number of <b>short-term / ad-hoc projects</b> or similar. | <b>Long-term</b> national monitoring is carried out but with <b>limited coverage and limited use</b> by stakeholders.                                        | <b>Long-term</b> national monitoring is carried out with <b>adequate coverage but limited use</b> by stakeholders. | <b>Long-term</b> national monitoring is carried out with <b>very good coverage and adequate use</b> by stakeholders. | <b>Long-term</b> national monitoring is carried out with <b>excellent coverage and excellent use</b> by stakeholders. |
|                                                                                                               | Score or n/a:                                                                                                                        | <b>[Enter score]</b>                            | Justification/evidence                                                                                 | [Enter text here. E.g. reference to monitoring systems, what is monitored and where, evidence of implementation and access to information for stakeholders.] |                                                                                                                    |                                                                                                                      |                                                                                                                       |

<sup>19</sup> See definition of monitoring in Terminology.

|               |                                                                                                                                                                |                                                     |                                                                                                                                                                                                              |                                                                                                                                                                 |                                                                                                                                          |                                                                                                                                                                     |                                                                                                                                                                             |
|---------------|----------------------------------------------------------------------------------------------------------------------------------------------------------------|-----------------------------------------------------|--------------------------------------------------------------------------------------------------------------------------------------------------------------------------------------------------------------|-----------------------------------------------------------------------------------------------------------------------------------------------------------------|------------------------------------------------------------------------------------------------------------------------------------------|---------------------------------------------------------------------------------------------------------------------------------------------------------------------|-----------------------------------------------------------------------------------------------------------------------------------------------------------------------------|
| b             | <b>Sustainable and efficient water use management<sup>20</sup></b> from the national level, (includes surface and/or groundwater, as relevant to the country). | <b>No management instruments being implemented.</b> | Use of management instruments is <b>limited</b> and only through <b>short-term / ad-hoc projects</b> or similar.                                                                                             | <b>Some</b> management instruments implemented on a more <b>long-term</b> basis, but with <b>limited coverage</b> across different water users and the country. | Management instruments are implemented on a long-term basis, with <b>adequate coverage</b> across different water users and the country. | Management instruments are implemented on a longterm basis, with <b>very good coverage</b> across different water users and the country, and are <b>effective</b> . | Management instruments are implemented on a long-term basis, with <b>excellent coverage</b> across different water users and the country, and are <b>highly effective</b> . |
| Score or n/a: | [Enter score]                                                                                                                                                  | Justification/evidence                              | [Enter text here. E.g. reference to types of management instruments and for what purposes, evidence of implementation, geographic differences, level of implementation across different stakeholder groups.] |                                                                                                                                                                 |                                                                                                                                          |                                                                                                                                                                     |                                                                                                                                                                             |

|               |                                                               | Very low (0)                                        | Low (20)                                                                                                                                                                               | Medium-low (40)                                                                                                                                   | Medium-high (60)                                                                                                           | High (80)                                                                                                                                             | Very high (100)                                                                                                                                               |
|---------------|---------------------------------------------------------------|-----------------------------------------------------|----------------------------------------------------------------------------------------------------------------------------------------------------------------------------------------|---------------------------------------------------------------------------------------------------------------------------------------------------|----------------------------------------------------------------------------------------------------------------------------|-------------------------------------------------------------------------------------------------------------------------------------------------------|---------------------------------------------------------------------------------------------------------------------------------------------------------------|
| c             | <b>Pollution control<sup>21</sup></b> from the national level | <b>No management instruments being implemented.</b> | Use of management instruments is <b>limited</b> and only through <b>short-term / ad-hoc projects</b> or similar.                                                                       | <b>Some</b> management instruments implemented on a more <b>long-term</b> basis, but with <b>limited coverage</b> across sectors and the country. | Management instruments are implemented on a long-term basis, with <b>adequate coverage</b> across sectors and the country. | Management instruments are implemented on a longterm basis, with <b>very good coverage</b> across sectors and the country, and are <b>effective</b> . | Management instruments are implemented on a long-term basis, with <b>excellent coverage</b> across sectors and the country, and are <b>highly effective</b> . |
| Score or n/a: | [Enter score]                                                 | Justification/evidence                              | [Enter text here. E.g. reference to types of management instruments, evidence of implementation, geographic differences, level of implementation across different stakeholder groups.] |                                                                                                                                                   |                                                                                                                            |                                                                                                                                                       |                                                                                                                                                               |

<sup>20</sup> Management instruments include demand management measures (e.g. technical measures, financial incentives, education and awareness raising to reduce water use and/or improve water-use efficiency, conservation, recycling and re-use), monitoring water use (including the ability to disaggregate by sector), mechanisms for allocating water between sectors (including environmental considerations).

<sup>21</sup> Includes regulations, water quality guidelines, economic tools (e.g. taxes and fees), water quality trading programs, water quality monitoring, education, consideration of point and non-point (e.g. agricultural) pollution sources, construction and operation of wastewater treatment plants, watershed management.

|   |                                                                                    |                                                     |                                                                                                                  |                                                                                                                                                                                                       |                                                                                                                                                                                                             |                                                                                                                                                                                                           |                                                                                                                                                                                                                 |
|---|------------------------------------------------------------------------------------|-----------------------------------------------------|------------------------------------------------------------------------------------------------------------------|-------------------------------------------------------------------------------------------------------------------------------------------------------------------------------------------------------|-------------------------------------------------------------------------------------------------------------------------------------------------------------------------------------------------------------|-----------------------------------------------------------------------------------------------------------------------------------------------------------------------------------------------------------|-----------------------------------------------------------------------------------------------------------------------------------------------------------------------------------------------------------------|
| d | <b>Management of water-related ecosystems<sup>22</sup></b> from the national level | <b>No management instruments being implemented.</b> | Use of management instruments is <b>limited</b> and only through <b>short-term / ad-hoc projects</b> or similar. | <b>Some</b> management instruments implemented on a more <b>long-term</b> basis, but with <b>limited coverage</b> across different ecosystem types and the country.                                   | Management instruments are implemented on a long-term basis, with <b>adequate coverage</b> across different ecosystem types and the country. Environmental Water Requirements (EWR) analysed in some cases. | Management instruments are implemented on a longterm basis, with <b>very good coverage</b> across different ecosystem types and the country, and are <b>effective</b> . EWR analysed for most of country. | Management instruments are implemented on a long-term basis, with <b>excellent coverage</b> across different ecosystem types and the country, and are <b>highly effective</b> . EWR analysed for whole country. |
|   | Score or n/a:                                                                      | [Enter score]                                       | Justification/evidence                                                                                           | [Enter text here. E.g. reference to types of management instruments, evidence of implementation and effectiveness, geographic differences, level of implementation across different ecosystem types.] |                                                                                                                                                                                                             |                                                                                                                                                                                                           |                                                                                                                                                                                                                 |

|                                                                                                  |                                                                                                                 | Very low (0)                                        | Low (20)                                                                                                         | Medium-low (40)                                                                                                                                                                                                     | Medium-high (60)                                                                                             | High (80)                                                                                                                               | Very high (100)                                                                                                                                 |
|--------------------------------------------------------------------------------------------------|-----------------------------------------------------------------------------------------------------------------|-----------------------------------------------------|------------------------------------------------------------------------------------------------------------------|---------------------------------------------------------------------------------------------------------------------------------------------------------------------------------------------------------------------|--------------------------------------------------------------------------------------------------------------|-----------------------------------------------------------------------------------------------------------------------------------------|-------------------------------------------------------------------------------------------------------------------------------------------------|
| e                                                                                                | <b>Management instruments to reduce impacts of water-related disasters<sup>23</sup> from the national level</b> | <b>No management instruments being implemented.</b> | Use of management instruments is <b>limited</b> and only through <b>short-term / ad-hoc projects</b> or similar. | <b>Some</b> management instruments implemented on a more <b>long-term</b> basis, but with <b>limited coverage</b> of at-risk areas.                                                                                 | Management instruments are implemented on a long-term basis, with <b>adequate coverage</b> of at-risk areas. | Management instruments are implemented on a longterm basis, with <b>very good coverage</b> of at-risk areas, and are <b>effective</b> . | Management instruments are implemented on a long-term basis, with <b>excellent coverage</b> of at-risk areas, and are <b>highly effective</b> . |
|                                                                                                  | Score or n/a:                                                                                                   | [Enter score]                                       | Justification/evidence                                                                                           | [Enter text here. E.g. reference to types of management instruments, evidence of implementation and effectiveness, geographic differences, level of implementation for different types of water-related disasters.] |                                                                                                              |                                                                                                                                         |                                                                                                                                                 |
| 3.2 What is the status of management instruments to support IWRM implementation at other levels? |                                                                                                                 |                                                     |                                                                                                                  |                                                                                                                                                                                                                     |                                                                                                              |                                                                                                                                         |                                                                                                                                                 |

<sup>22</sup> Water-related ecosystems include rivers, lakes and aquifers, as well as wetlands, forests and mountains. Management of these systems includes tools such as management plans, the assessment of Environmental Water Requirements (EWR), and protection of areas and species. Monitoring includes measuring the extent and quality of the ecosystems over time.

<sup>23</sup> **Management instruments** can cover: understanding disaster risk; strengthening disaster risk governance; investing in disaster risk reduction; and enhancing disaster preparedness. **Impacts** include social impacts (such as deaths, missing persons, and number of people affected) and economic impacts (such as economic losses in relation to GDP). **Water-related disasters** include disasters that can be classified under the following: Hydrological (flood, landslide, wave action); Meteorological (convective storm, extratropical storm, extreme temperature, fog, tropical cyclone); and Climatological (drought, glacial lake outburst, wildfire).

|   |                                               |               |                                                            |                                                                                                                                                                                                          |                                                                                                                                                              |                                                                                                                                                               |                                                                                                                                                                              |                                                                                                                                                                                     |
|---|-----------------------------------------------|---------------|------------------------------------------------------------|----------------------------------------------------------------------------------------------------------------------------------------------------------------------------------------------------------|--------------------------------------------------------------------------------------------------------------------------------------------------------------|---------------------------------------------------------------------------------------------------------------------------------------------------------------|------------------------------------------------------------------------------------------------------------------------------------------------------------------------------|-------------------------------------------------------------------------------------------------------------------------------------------------------------------------------------|
| a | Basin management instruments. <sup>24</sup>   |               | No basin level management instruments being implemented.   | Use of basin level management instruments is <b>limited</b> and only through <b>short-term / adhoc projects</b> .                                                                                        | <b>Some</b> basin level management instruments implemented on a more <b>long-term</b> basis, but with <b>limited geographic and stakeholder coverage</b> .   | Basin level management instruments implemented on a more <b>long-term</b> basis, with <b>adequate geographic and stakeholder coverage</b> .                   | Basin level management instruments implemented on a more <b>long-term</b> basis, with <b>effective outcomes</b> and <b>very good geographic and stakeholder coverage</b> .   | Basin level management instruments implemented on a more <b>long-term</b> basis, with <b>highly effective outcomes</b> and <b>excellent geographic and stakeholder coverage</b> .   |
|   | Score or n/a:                                 | [Enter score] | Justification/evidence                                     | [Enter text here. E.g. reference to types of management instruments, evidence of implementation and effectiveness, geographic differences, level of implementation across different stakeholder groups.] |                                                                                                                                                              |                                                                                                                                                               |                                                                                                                                                                              |                                                                                                                                                                                     |
|   |                                               |               | Very low (0)                                               | Low (20)                                                                                                                                                                                                 | Medium-low (40)                                                                                                                                              | Medium-high (60)                                                                                                                                              | High (80)                                                                                                                                                                    | Very high (100)                                                                                                                                                                     |
| b | Aquifer management instruments. <sup>25</sup> |               | No aquifer level management instruments being implemented. | Use of aquifer level management instruments is <b>limited</b> and only through <b>short-term / adhoc projects</b> .                                                                                      | <b>Some</b> aquifer level management instruments implemented on a more <b>long-term</b> basis, but with <b>limited geographic and stakeholder coverage</b> . | Aquifer level management instruments implemented on a more <b>long-term</b> basis, with <b>adequate geographic and stakeholder coverage</b> .                 | Aquifer level management instruments implemented on a more <b>long-term</b> basis, with <b>effective outcomes</b> and <b>very good geographic and stakeholder coverage</b> . | Aquifer level management instruments implemented on a more <b>long-term</b> basis, with <b>highly effective outcomes</b> and <b>excellent geographic and stakeholder coverage</b> . |
|   | Score or n/a:                                 | [Enter score] | Justification/evidence                                     | [Enter text here. E.g. reference to types of management instruments, evidence of implementation and effectiveness, geographic differences, level of implementation across different stakeholder groups.] |                                                                                                                                                              |                                                                                                                                                               |                                                                                                                                                                              |                                                                                                                                                                                     |
| c | Data and information sharing <u>within</u>    |               | No data and information sharing.                           | <b>Limited</b> data and information sharing <b>on an ad-hoc basis</b> .                                                                                                                                  | Data and information sharing <b>arrangements exist</b> on a more <b>longterm basis between major data providers and users</b> .                              | Data and information sharing <b>arrangements implemented</b> on a more <b>long-term basis</b> , with <b>adequate coverage</b> across sectors and the country. | Data and information sharing <b>arrangements implemented</b> on a more <b>long-term basis</b> , with <b>very good coverage</b>                                               | <b>All relevant data and information are online and freely accessible to all</b> .                                                                                                  |

<sup>24</sup> Basin and aquifer management: involves managing water at the appropriate hydrological scale, using the surface water basin or aquifer as the unit of management. This may involve basin and aquifer development, use and protection plans. It should also promote multi-level cooperation, and address potential conflict, among users, stakeholders and levels of government for the management of water resources. To achieve 'Very high (100)' basin and aquifer management scores, surface and groundwater management must be integrated.

<sup>25</sup> See previous footnote on basin management instruments, which also applies to aquifers.

|                                               |                                                                     |                                         |                                                                                                                  |                                                                                          |                                                                          |                                                                                        |                                                                                              |
|-----------------------------------------------|---------------------------------------------------------------------|-----------------------------------------|------------------------------------------------------------------------------------------------------------------|------------------------------------------------------------------------------------------|--------------------------------------------------------------------------|----------------------------------------------------------------------------------------|----------------------------------------------------------------------------------------------|
|                                               | <b>countries at all levels<sup>26</sup></b>                         |                                         |                                                                                                                  |                                                                                          |                                                                          |                                                                                        | across sectors and the country.                                                              |
|                                               | Score or n/a: <b>[Enter score]</b>                                  | Justification/evidence                  | [Enter text here. E.g. reference to different data and information sharing arrangements, access to information.] |                                                                                          |                                                                          |                                                                                        |                                                                                              |
| d                                             | <b>Transboundary data and information sharing between countries</b> | <b>No data and information sharing.</b> | <b>Limited</b> data and information sharing <b>on an ad-hoc or informal basis.</b>                               | Data and information sharing <b>arrangements exist, but sharing is limited.</b>          | Data and information sharing <b>arrangements implemented adequately.</b> | Data and information sharing <b>arrangements implemented effectively.<sup>27</sup></b> | All relevant data and information are <b>online</b> and <b>accessible between countries.</b> |
|                                               | Score or n/a: <b>[Enter score]</b>                                  | Justification/evidence                  | [Enter text here. E.g. reference to different data and information sharing arrangements, access to information.] |                                                                                          |                                                                          |                                                                                        |                                                                                              |
| <b>Average 'Management Instruments' score</b> |                                                                     |                                         | <b>[Enter score here]</b>                                                                                        | In case of 'n/a' for any questions, they should be omitted from the average calculation. |                                                                          |                                                                                        |                                                                                              |

## 4. Financing

This section concerns the adequacy of the finance available for water resources development and management from various sources.

Finance for investment and recurrent costs can come from many sources, the most common being central government budget allocations to relevant ministries and other authorities. Finance from Overseas Development Assistance (ODA) specifically for water resources should be considered part of the government budget. Note that the level of coordination between ODA and national budgets is tracked by the 'means of implementation' indicator 6.a.1: "Amount of water- and sanitation-related official development assistance that is part of a government-coordinated spending plan", as part of reporting on Target 6.a: "By 2030, expand international cooperation and capacity-building support to developing countries in water- and sanitation-related activities and programmes, including water harvesting, desalination, water efficiency, wastewater treatment, recycling and reuse technologies".

<sup>26</sup> Includes more formal data and information sharing arrangements between users, as well as accessibility for the general public, where appropriate.

<sup>27</sup> E.g. institutional and technical mechanisms in place that allow for exchanging data as agreed upon in agreements between riparians (e.g. regional database or information exchange platform with a river basin organization including technical requirements for data submission, institutionalized mechanisms for QA and for analysing the data, etc.).

“Other sources” include fees and tariffs levied on water users, polluter fees or grants from philanthropic or similar organisations. In kind support should not be included as it is not easily measurable but can be mentioned in the ‘Justification/evidence’ section.

Investments should cover all aspects of water resources development and management but exclude any related to drinking water supply and sanitation services as they are covered in other monitoring processes.

Please take note of all footnotes as they contain important information and clarification of terms used in the questions and thresholds.

Enter your score, **in increments of 10**, from 0-100, or n/a (not applicable), in the yellow cell immediately below each question. You are strongly encouraged to provide the justification and references to evidence for the score in the grey cell to the right of the score. This will help achieve agreement among different stakeholders in the country, as well as help monitor progress over time. Suggestions for the type of information required are provided. You may also provide further information you think is relevant, or links to further documentation. If ‘Very high (100)’ or ‘n/a’ is selected, a justification should be provided.

| 4. Financing                                                                                                     |                                                                                                           |                                                          |                                                                                   |                                                                                                                        |                                                                                                |                                                                         |                                                                                                             |
|------------------------------------------------------------------------------------------------------------------|-----------------------------------------------------------------------------------------------------------|----------------------------------------------------------|-----------------------------------------------------------------------------------|------------------------------------------------------------------------------------------------------------------------|------------------------------------------------------------------------------------------------|-------------------------------------------------------------------------|-------------------------------------------------------------------------------------------------------------|
|                                                                                                                  |                                                                                                           | Degree of implementation (0 – 100)                       |                                                                                   |                                                                                                                        |                                                                                                |                                                                         |                                                                                                             |
|                                                                                                                  |                                                                                                           | Very low (0)                                             | Low (20)                                                                          | Medium-low (40)                                                                                                        | Medium-high (60)                                                                               | High (80)                                                               | Very high (100)                                                                                             |
| <b>4.1 What is the status of financing for water resources development and management at the national level?</b> |                                                                                                           |                                                          |                                                                                   |                                                                                                                        |                                                                                                |                                                                         |                                                                                                             |
| a                                                                                                                | <b>National budget<sup>28</sup> for investment including water resources infrastructure<sup>29</sup>.</b> | <b>No budget</b> allocated in national investment plans. | <b>Budget allocated</b> but only partly covers planned investments.               | <b>Sufficient budget allocated</b> for planned investments but insufficient funds disbursed or made <b>available</b> . | <b>Sufficient budget allocated and funds disbursed</b> for all planned programmes or projects. | <b>Funding available and all planned projects under implementation.</b> | Planned programs <b>completed</b> , postevaluation carried out and new funding cycle for programs underway. |
|                                                                                                                  | Score or n/a: <b>[Enter score]</b>                                                                        | Justification/evidence                                   | [Enter text here. E.g. reference to adequacy of budget, significant budget gaps.] |                                                                                                                        |                                                                                                |                                                                         |                                                                                                             |

<sup>28</sup> Allocations of funding for water resources may be included in several budget categories or in different investment documents. Respondents are thus encouraged to examine different sources for this information. When assessing the allocations respondents should take account of funds from government budgets and any co-funding (loans or grants) from other sources such as banks or donors.

<sup>29</sup> Infrastructure includes ‘hard’ structures such as dams, canals, pumping stations, flood control, treatment works etc as well as soft infrastructure and environmental measures such as catchment management, sustainable drainage systems etc. For this survey do not include infrastructure for drinking water supply or sanitation services.

|   |                                                                                  |                                                                             |                                                                                                     |                                                                                        |                                                                                |                                                                                   |                                                                                          |
|---|----------------------------------------------------------------------------------|-----------------------------------------------------------------------------|-----------------------------------------------------------------------------------------------------|----------------------------------------------------------------------------------------|--------------------------------------------------------------------------------|-----------------------------------------------------------------------------------|------------------------------------------------------------------------------------------|
| b | <b>National budget for the recurrent costs of the IWRM elements<sup>30</sup></b> | <b>No budget</b> allocations made for recurrent costs of the IWRM elements. | <b>Allocations</b> made for <b>only a few</b> of the elements and implementation at an early stage. | Allocations made for <b>at least half</b> of the elements but insufficient for others. | Allocations for <b>most of the elements</b> and some implementation under way. | Allocations include <b>all elements</b> and implementation regularly carried out. | Planned budget allocations for all elements of the IWRM approach <b>fully utilised</b> . |
|   | Score or n/a:                                                                    | [Enter score]                                                               | Justification/evidence                                                                              | [Enter text here. E.g. reference to adequacy of budget, significant budget gaps.]      |                                                                                |                                                                                   |                                                                                          |

|                                                                                                            |                                                                                                                    | Very low (0)                                                          | Low (20)                                                                          | Medium-low (40)                                                                                                        | Medium-high (60)                                                                        | High (80)                                                                | Very high (100)                                                                                      |
|------------------------------------------------------------------------------------------------------------|--------------------------------------------------------------------------------------------------------------------|-----------------------------------------------------------------------|-----------------------------------------------------------------------------------|------------------------------------------------------------------------------------------------------------------------|-----------------------------------------------------------------------------------------|--------------------------------------------------------------------------|------------------------------------------------------------------------------------------------------|
| <b>4.2 What is the status of financing for water resources development and management at other levels?</b> |                                                                                                                    |                                                                       |                                                                                   |                                                                                                                        |                                                                                         |                                                                          |                                                                                                      |
| a                                                                                                          | <b>Sub-national or basin budgets for investment including water resources infrastructure.</b>                      | <b>No budget</b> allocated In sub-national or basin investment plans. | <b>Budget allocated</b> but only partly covers planned investments.               | <b>Sufficient budget allocated</b> for planned investments but insufficient funds disbursed or made <b>available</b> . | Sufficient budget allocated and funds disbursed for all planned programmes or projects. | Funding available and all <b>planned projects under implementation</b> . | <b>Budget fully utilised</b> , programmes completed as planned and post evaluation carried out.      |
|                                                                                                            | Score or n/a:                                                                                                      | [Enter score]                                                         | Justification/evidence                                                            | [Enter text here. E.g. reference to adequacy of budget, significant budget gaps.]                                      |                                                                                         |                                                                          |                                                                                                      |
| b                                                                                                          | <b>Revenues</b> raised from dedicated levies on water users at basin, aquifer or subnational levels. <sup>31</sup> | <b>No revenues</b> raised at the <b>sub-national</b> level.           | <b>Processes in place</b> to raise local revenue but <b>not yet implemented</b> . | Limited revenues raised from <b>charges, but are not</b> used for IWRM activities.                                     | Limited revenues raised from <b>charges</b> cover some IWRM activities.                 | Revenues raised from <b>charges</b> cover most IWRM activities.          | Local authorities raise funds <b>from multiple sources and fully cover costs</b> of IWRM activities. |

<sup>30</sup> 'IWRM elements' refers to all the activities described in sections 1, 2 and 3 of this survey that require funding, e.g. policy, law making and planning, institutional strengthening, coordination, stakeholder participation, capacity building, and management instruments such as research and studies, gender and environmental assessments, data collection, monitoring etc.

<sup>31</sup> For example, abstraction & bulk water charges, environmental fees such as pollution charges, Payment for Ecosystem Services (PES) schemes, and the sale of secondary products and services, significant contributors.

|                           |                                                                     |               |                                                                                   |                                                                                                                              |                                                                            |                                                                            |                                                                            |                                                                   |
|---------------------------|---------------------------------------------------------------------|---------------|-----------------------------------------------------------------------------------|------------------------------------------------------------------------------------------------------------------------------|----------------------------------------------------------------------------|----------------------------------------------------------------------------|----------------------------------------------------------------------------|-------------------------------------------------------------------|
|                           | Score or n/a:                                                       | [Enter score] | Justification/evidence                                                            | [Enter text here. E.g. reference to types of revenues raised and mechanisms, and adequacy of revenues to meet requirements.] |                                                                            |                                                                            |                                                                            |                                                                   |
| c                         | Financing for transboundary <sup>32</sup> cooperation <sup>33</sup> |               | No specific funding allocated from the MS budgets nor from other regular sources. | MS agreement on country share of contributions in place and in-kind support for the cooperation organisation / arrangement.  | Funding less than 50% of that expected as contributions and by regulation. | Funding less than 75% of that expected as contributions and by regulation. | Funding more than 75% of that expected as contributions and by regulation. | Full funding of that expected as contributions and by regulation. |
|                           | Score or n/a:                                                       | [Enter score] | Justification/evidence                                                            | [Enter text here. E.g. reference to financing arrangements, evidence of contributions.]                                      |                                                                            |                                                                            |                                                                            |                                                                   |
| Average 'Financing' score |                                                                     |               | [Enter score here]                                                                | In case of 'n/a' for any questions, they should be omitted from the average calculation.                                     |                                                                            |                                                                            |                                                                            |                                                                   |
| A                         |                                                                     |               |                                                                                   |                                                                                                                              |                                                                            |                                                                            |                                                                            |                                                                   |

## 5. Indicator 6.5.1 score

Please complete the following table based on scores calculated for the previous four sections.

The indicator 6.5.1 score is the average of each of the section scores.

| Section                                                                  | Average Score |
|--------------------------------------------------------------------------|---------------|
| Section 1 Enabling Environment                                           |               |
| Section 2 Institutions and Participation                                 |               |
| Section 3 Management Instruments                                         |               |
| Section 4 Financing                                                      |               |
| <b>Indicator 6.5.1 score<br/>= Degree of IWRM implementation (0-100)</b> |               |

<sup>32</sup> Transboundary includes surface and groundwater basins that cross one or more national borders.

<sup>33</sup> In this question "Member States (MS)" refers to riparian countries that are parties to the arrangement. "Contributions" refers to the annual share of funds agreed from MS national budgets to support the agreed TB cooperation arrangement. Regular funds obtained from for example, water user fees (e.g. hydropower charges) and polluter-pays fees on the basis of existing regulation are also taken into account as sustainable funding. As variable and unsustainable, donor support is not considered. .

(Please remember: Questions where the score is 0 (zero) must be included. However, questions that are not applicable must not be included.)

### **Interpretation of the score**

The score indicates the 'degree of implementation of Integrated Water Resources Management', on a scale of 0 to 100, with 0 signifying no implementation, and 100 signifying complete implementation. However, the true value of the questionnaire to countries lies within the scores and justification provided for the individual questions, as this helps to identify which actions need to be taken to move towards a greater degree of implementation of IWRM.
